# Supplementary material for: Association of Polo-Like Kinase 3 and PhosphoT273 Caspase 8 Levels With Disease-Related Outcomes Among Cervical Squamous Cell Carcinoma Patients Treated With Chemoradiation and Brachytherapy
Source: PubMed Central journal article supplement (PMC6702309; doi:10.3389/fonc.2019.00742), 2019-08-14
Supplement: Table_1.pdf [file Table_1.pdf]

**Supplemental Table 1. Univariate and multivariate analyses of prognostic factors and combined PLK3/pT273 Caspase 8 variable in patients with CSCC.**

|                                                | Univariate<br>p-value | Hazard<br>ratio (HR) | Multivariate analyses         |        | p-value      |
|------------------------------------------------|-----------------------|----------------------|-------------------------------|--------|--------------|
|                                                |                       |                      | 95 % Confidence interval (CI) |        |              |
|                                                |                       |                      | lower                         | upper  |              |
| <b>Cumulative incidence of distant failure</b> |                       |                      |                               |        |              |
| T-stage (T1-2/T3-4)                            | <b>0.011</b>          | 1.28                 | 0.26                          | 6.36   | 0.756        |
| FIGO (Ia-IIb/IIIa-IVb)                         | <b>0.008</b>          | 7.09                 | 0.89                          | 56.06  | 0.063        |
| combined PLK3/pCasp 8                          | <b>0.005</b>          | 4.28                 | 1.06                          | 17.30  | <b>0.041</b> |
| <b>Cancer-specific survival</b>                |                       |                      |                               |        |              |
| T-stage (T1-2/T3-4)                            | <b>0.006</b>          | 1.36                 | 0.15                          | 11.87  | 0.777        |
| FIGO (Ia-IIB/IIIa-IVb)                         | <b>0.017</b>          | 2.88                 | 0.64                          | 12.99  | 0.167        |
| p16 (WS ≤ 6/>6)                                | <b>0.013</b>          | 1.75                 | 0.60                          | 5.03   | 0.299        |
| combined PLK3/pCasp 8                          | <b>&lt;0.001</b>      | 23.20                | 2.87                          | 187.09 | <b>0.003</b> |
